# Supplementary material for: Menin Modulates Mammary Epithelial Cell Numbers in Bovine Mammary Glands Through Cyclin D1
Source: PubMed Central journal article supplement (PMC5854757; doi:10.1007/s10911-017-9385-8), 2017-11-29
Supplement: 10911_2017_9385_MOESM1_ESM.pdf [file 10911_2017_9385_MOESM1_ESM.pdf]

**Menin modulates mammary epithelial cell numbers in bovine mammary glands through *Cyclin D1***

Kerong Shi<sup>\*</sup>, Xue Liu, Honghui Li, Xueyan Lin, Zhengui Yan, Qiaoqiao Cao, Meng Zhao, Zhongjin Xu, and Zhonghua Wang<sup>\*</sup>

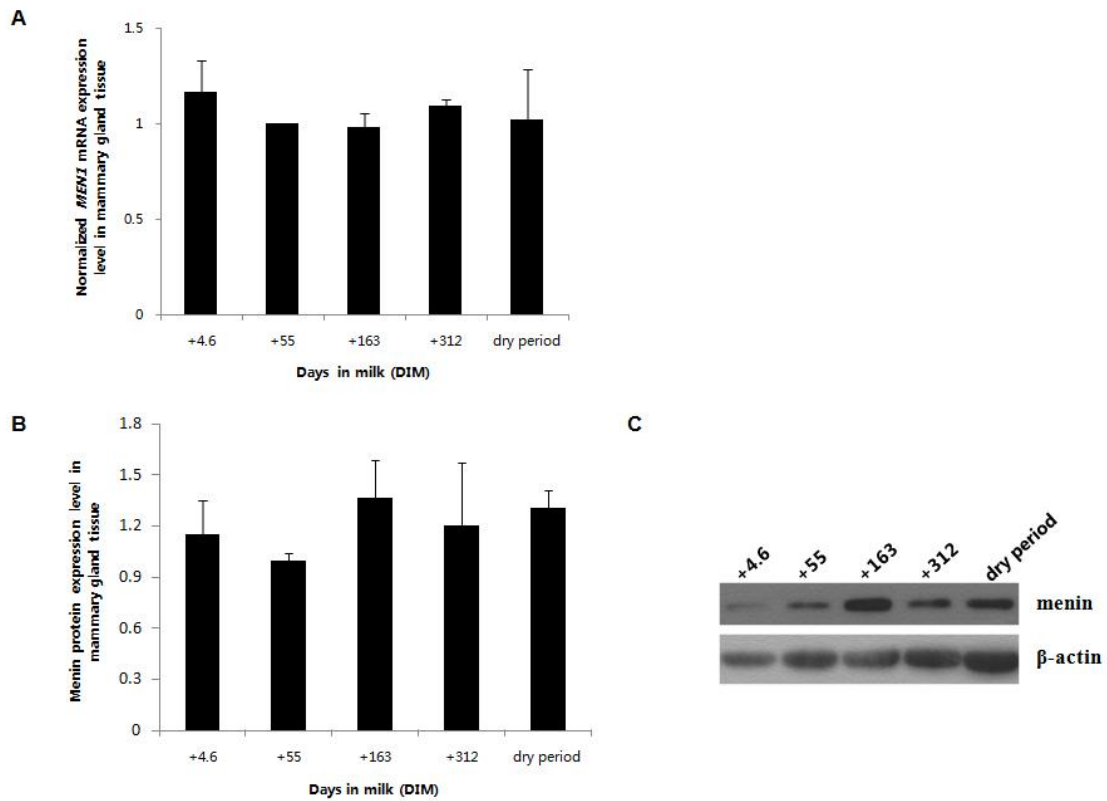

**Supplementary Fig. S1. *MEN1*/menin expression in mammary gland tissue decreases in the early lactation period and increases by the end of lactation and in the dry period.** To investigate the expression levels of *MEN1*/menin during lactation cycle in the mammary glands of dairy cows, mammary gland tissues from 5 different lactation stages of cows on days in milk (DIM) + ( $4.6 \pm 1.5$ ), ( $55 \pm 4.3$ ), ( $163 \pm 6.24$ ) and ( $312 \pm 24.6$ ) as well as during the dry period, were used to analyze the expression levels of *MEN1* mRNA (A) and its encoded protein menin (B) via qRT-PCR and western blotting. The data are shown as relative expression levels normalized to an internal control  $\beta$ -Actin. The expression level of *MEN1*/menin at each stage was determined in two or three different individuals at each lactation stage. The results showed that the levels of both *MEN1* mRNA (A) and the menin protein (B) slowly decreased with advancing lactation, but later increased after the peak milking stage through the dry period (or involution stage), with the lowest expression level of menin being observed around the peak lactation stage ( $55 \pm 4.3$  days in milk, DIM). One-way ANOVA analysis indicated no statistical difference among different lactation

stages ( $P=0.108$  and  $P=0.114$  for mRNA and protein expression, respectively.) (C)  
Representative western blot images of the expression of menin and the loading control  $\beta$ -actin are shown.

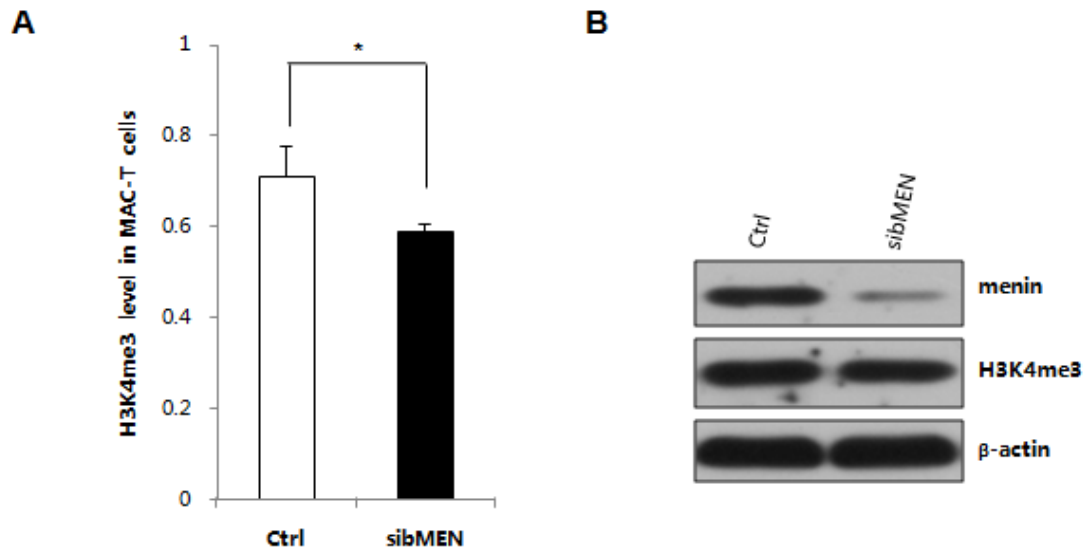

**Supplementary Fig. S2 Besides *CyclinD1* expression suppression, histone H3 lysine 4 trimethylation (H3K4me3) was inhibited upon *MEN1*/menin knockdown in mammary epithelial cells.** (A) Histone H3 lysine 4 trimethylation level was decreased in MAC-T cells at 24h after transfected with *MEN1*-specific siRNAs (sibMEN), compared with its negative control (Ctrl) (n=3). \*  $P < 0.05$ . (C) Representative western blot images using antibodies against-menin (Bethyl), anti-H3K4me3 (Sangon) and anti- $\beta$ -Actin (Beytime) are shown.  $\beta$ -Actin serves as a lysate loading control.

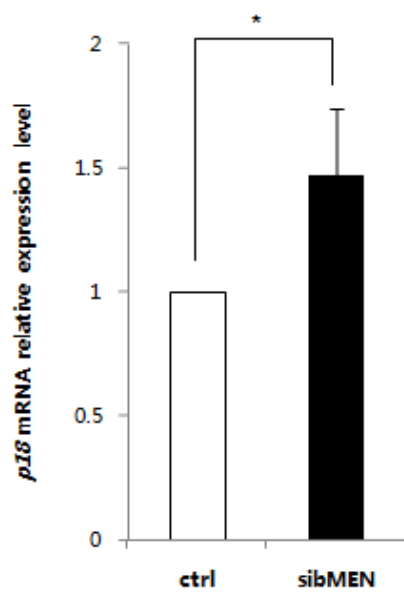

**Supplementary Fig. S3 Cell progression negative regulator gene *p18* was up-regulated in mammary epithelial cells.** Expression of *p18* was assessed at 24h in the MAC-T cells transfected with *MEN1*-specific siRNAs (sibMEN), as well as its negative control (Ctrl). Data are shown as relative expression levels normalized to an internal control  $\beta$ -Actin. \* $P < 0.05$ .

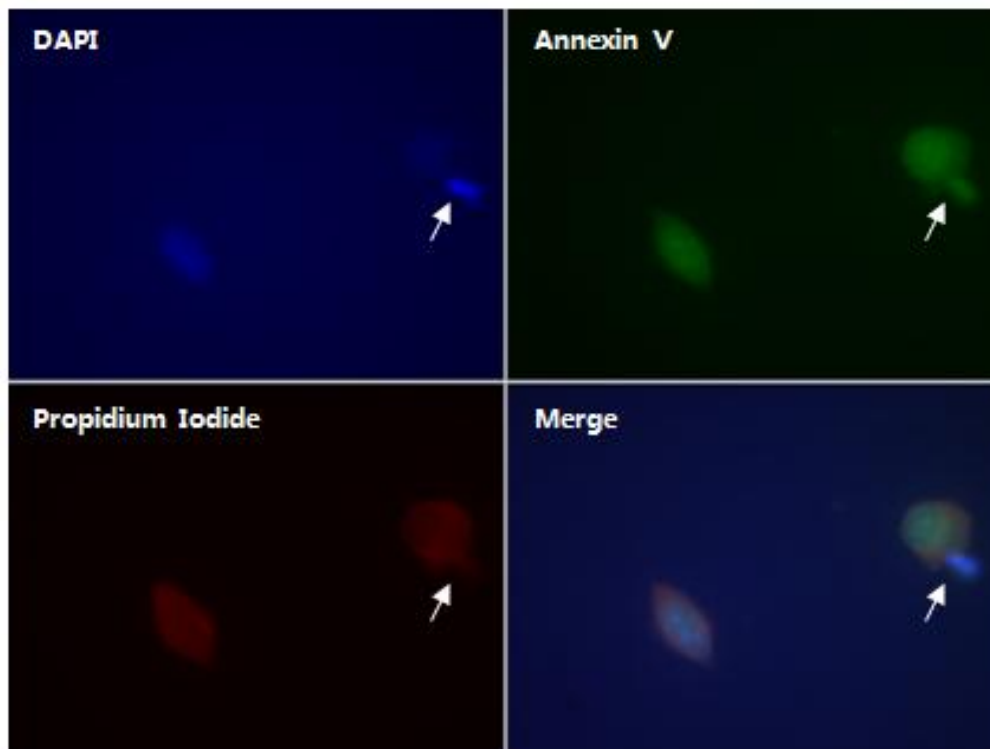

**Supplementary Fig. S4 Suppression of *MEN1*/menin expression induced mammary epithelial cell apoptosis.** Mammary epithelial cells MAC-T were exposed to *MEN1*-specific siRNAs for 24 hours and assessed for the cell apoptosis by Annexin V/propidium iodide (PI) staining. Cells were stained with Annexin V (green) and PI (red) and mounted in DAPI-containing anti-fade mounting medium. The apoptotic cells with broken cell membrane can be stained by both Annexin- V-FITC and propidium iodide. The two epithelial cells in the images showed apoptosis, with positive for both annexin V and PI staining. Arrow shows the cell in late apoptosis, with broken cell membrane and fragmented nuclear DNA waded out.

**Supplementary Table S1 Sequences information of siRNAs specific to *MEN1* gene<sup>1,2</sup>**

| <b>Name</b> | <b>Sense(5'-3')</b>      | <b>Anti-sense (3'-5')</b> |
|-------------|--------------------------|---------------------------|
| sibMEN-1    | CCGUUGACCUGUCUCUCUA dTdT | dTdT GGCAACUGGACAGAGAGAU  |
| sibMEN-2    | CCACUGUCGUAACCGCAAU dTdT | CCACUGUCGUAACCGCAAU dTdT  |
| sibMEN-3    | CCGAGUGACUACACGCUUU dTdT | dTdT GGCUCACUGAUGUGCGAAA  |

<sup>1</sup>The “dT” letters denote deoxythymines.

<sup>2</sup>A scramble siRNA was also used in the study as the negative control. We can't provide its sequence because it belongs to commercial confidentiality of Ribobio (Guangzhou, China).

**Supplementary Table S2 Primer sequences of target genes detected for expression analysis in MAC-T cells and mammary gland tissues**

| Gene            | Primers | Primer sequences (5'→3') | Product size |
|-----------------|---------|--------------------------|--------------|
| <i>MEN1</i>     | Forward | GATGGAGGTGGCATTATGG      | 256bp        |
|                 | Reverse | GATGTGCTCATCCCGGTAGT     |              |
| <i>β-actin</i>  | Forward | CCCAGCACAATGAAGATCAA     | 180bp        |
|                 | Reverse | TAGAAGCATTGCGGTGGAC      |              |
| <i>CyclinD1</i> | Forward | AGAAGTGCAGGAAGAGGT       | 186bp        |
|                 | Reverse | CGGATGGAGTTGTCAGTGT      |              |
| <i>CyclinD3</i> | Forward | AGCGCTGTGAAGAGGAAGTC     | 224bp        |
|                 | Reverse | CAAGACCAGCACCCAAT        |              |
| <i>CyclinB1</i> | Forward | AAAGGCTCCTGTACCTGTGC     | 215bp        |
|                 | Reverse | CTCCGTCTTCTGCATCCACA     |              |
| <i>CyclinB2</i> | Forward | TTCTCCACACCTCAGGACA      | 276bp        |
|                 | Reverse | AGCAGCCTGAACTGGAGTG      |              |
| <i>CyclinA2</i> | Forward | AGGACCAAGAAAGCCACTGG     | 292bp        |
|                 | Reverse | CAGGGTCTCGTTCTGCAGTT     |              |
| <i>CDK1</i>     | Forward | CAGCTGGCTACTCAACTCCA     | 162bp        |
|                 | Reverse | CCACTTCTGGCCCACTTCA      |              |
| <i>CDK4</i>     | Forward | GGAGACCAAAGTGACCCTGG     | 212bp        |
|                 | Reverse | GCTTGACTGTCCCACCACTT     |              |
| <i>CDK6</i>     | Forward | CGAGGCCTGGACTTTCTTCA     | 226bp        |
|                 | Reverse | CAACGCTCCAGAGATCCACA     |              |
| <i>p18</i>      | Forward | CATTCATGATGCGCCAGAG      | 288bp        |
|                 | Reverse | CATTGCAGATTCGCAGCTCC     |              |



**Supplementary Table S3 Primer information of the six amplicons of the promoter region of *Cyclin D1* gene used in the ChIP assay**

| <b>Name</b> | <b>Promoter region <sup>1</sup></b> | <b>Primer sequences (5'→3')</b>                     | <b>Product size (bp)</b> |
|-------------|-------------------------------------|-----------------------------------------------------|--------------------------|
| P1          | -1342 ~ -1103                       | F: TGTTAAGACTGGGTAAGATGTCC<br>R: TGAGCCTGAGGTGGTTGG | 240                      |
| P2          | -901 ~ -692                         | F: TGTTAAATTGCCGGCACAGG<br>R: TTTCAGCCTAACATGCGCTC  | 210                      |
| P3          | -602 ~ -442                         | F: CCCTGAGTCCCTGAATGGTA<br>R: GGGTTCGGTGACACTCTGAG  | 160                      |
| P4          | -374 ~ -223                         | F: TCTGCAGAGCCACCTTCAC<br>R: CGAAGCCGGGTTTTTCATAGA  | 152                      |
| P5          | -242 ~ -31                          | F: TCTATGAAAACCCGGCTTCG<br>R: AAACCTCCCCTGTAGTCCGTG | 212                      |
| P6          | -19 ~ +194                          | F: GCAAAGTCCTAGAGCCTCCA<br>R: TCTCCATCTCGCAGCACAG   | 213                      |

<sup>1</sup> shown is the start and end position of the target region. Given the transcription start site is +1, its upstream region is labeled as “-“ using increasing number from 3’ to 5’, while, its downstream region labeled as “+”.
